# Supplementary material for: The causal relationship between sarcopenic obesity factors and benign prostate hyperplasia
Source: Front Endocrinol (Lausanne). 2023 Nov 8;14:1290639. doi: 10.3389/fendo.2023.1290639 (PMC10663947; doi:10.3389/fendo.2023.1290639)
Supplement: Supplementary Table 1 — SNPs of BMR for BPH in TSMR. [file Table_1.xlsx]

## Sheet: Sheet1
outcome	exposure	method	Q	Q_df	Q_pval
Hyperplasia of prostate || id:finn-b-N14_PROSTHYPERPLA	Basal metabolic rate || id:ukb-a-268	MR Egger	463.315	363	0.000279482
Hyperplasia of prostate || id:finn-b-N14_PROSTHYPERPLA	Basal metabolic rate || id:ukb-a-268	Inverse variance weighted	464.839	364	0.000266793
Hyperplasia of prostate || id:finn-b-N14_PROSTHYPERPLA	Appendicular lean mass || id:ebi-a-GCST90000026	MR Egger	403.293	307	0.000180372
Hyperplasia of prostate || id:finn-b-N14_PROSTHYPERPLA	Appendicular lean mass || id:ebi-a-GCST90000026	Inverse variance weighted	403.441	308	0.000204875
