# Supplementary material for: The causal relationship between sarcopenic obesity factors and benign prostate hyperplasia
Source: Front Endocrinol (Lausanne). 2023 Nov 8;14:1290639. doi: 10.3389/fendo.2023.1290639 (PMC10663947; doi:10.3389/fendo.2023.1290639)
Supplement: Supplementary Table 4 — The SNPs selected for other obesity factors to perform Multivariable MR analysis. [file Table_2.xlsx]

## Sheet: Sheet1
outcome	exposure	method	Q	Q_df	Q_pval
Hyperplasia of prostate || id:finn-b-N14_PROSTHYPERPLA	Body fat percentage || id:ukb-a-264	MR Egger	295.485	236	0.00513056
Hyperplasia of prostate || id:finn-b-N14_PROSTHYPERPLA	Body fat percentage || id:ukb-a-264	Inverse variance weighted	296.697	237	0.00507541
Hyperplasia of prostate || id:finn-b-N14_PROSTHYPERPLA	Whole body fat mass || id:ukb-a-265	MR Egger	332.898	262	0.00196621
Hyperplasia of prostate || id:finn-b-N14_PROSTHYPERPLA	Whole body fat mass || id:ukb-a-265	Inverse variance weighted	335.498	263	0.00164975
Hyperplasia of prostate || id:finn-b-N14_PROSTHYPERPLA	Whole body fat-free mass || id:ukb-a-266	MR Egger	466.438	388	0.00380146
Hyperplasia of prostate || id:finn-b-N14_PROSTHYPERPLA	Whole body fat-free mass || id:ukb-a-266	Inverse variance weighted	467.155	389	0.00393988
Hyperplasia of prostate || id:finn-b-N14_PROSTHYPERPLA	Whole body water mass || id:ukb-a-267	MR Egger	475.419	385	0.0011175
Hyperplasia of prostate || id:finn-b-N14_PROSTHYPERPLA	Whole body water mass || id:ukb-a-267	Inverse variance weighted	475.982	386	0.00118319
Hyperplasia of prostate || id:finn-b-N14_PROSTHYPERPLA	Leg fat percentage (right) || id:ukb-a-274	MR Egger	265.524	224	0.0298332
Hyperplasia of prostate || id:finn-b-N14_PROSTHYPERPLA	Leg fat percentage (right) || id:ukb-a-274	Inverse variance weighted	266.575	225	0.0299404
Hyperplasia of prostate || id:finn-b-N14_PROSTHYPERPLA	Leg fat mass (right) || id:ukb-a-275	MR Egger	323.447	256	0.00270181
Hyperplasia of prostate || id:finn-b-N14_PROSTHYPERPLA	Leg fat mass (right) || id:ukb-a-275	Inverse variance weighted	325.224	257	0.00250299
Hyperplasia of prostate || id:finn-b-N14_PROSTHYPERPLA	Leg fat-free mass (right) || id:ukb-a-276	MR Egger	437.292	348	0.000797682
Hyperplasia of prostate || id:finn-b-N14_PROSTHYPERPLA	Leg fat-free mass (right) || id:ukb-a-276	Inverse variance weighted	440.707	349	0.000616065
Hyperplasia of prostate || id:finn-b-N14_PROSTHYPERPLA	Leg predicted mass (right) || id:ukb-a-277	MR Egger	426.708	347	0.00221576
Hyperplasia of prostate || id:finn-b-N14_PROSTHYPERPLA	Leg predicted mass (right) || id:ukb-a-277	Inverse variance weighted	429.547	348	0.00184904
Hyperplasia of prostate || id:finn-b-N14_PROSTHYPERPLA	Leg fat percentage (left) || id:ukb-a-278	MR Egger	272.481	235	0.0469659
Hyperplasia of prostate || id:finn-b-N14_PROSTHYPERPLA	Leg fat percentage (left) || id:ukb-a-278	Inverse variance weighted	273.936	236	0.0454376
Hyperplasia of prostate || id:finn-b-N14_PROSTHYPERPLA	Leg fat mass (left) || id:ukb-a-279	MR Egger	333.957	257	0.000863745
Hyperplasia of prostate || id:finn-b-N14_PROSTHYPERPLA	Leg fat mass (left) || id:ukb-a-279	Inverse variance weighted	336.494	258	0.000723157
Hyperplasia of prostate || id:finn-b-N14_PROSTHYPERPLA	Leg fat-free mass (left) || id:ukb-a-280	MR Egger	461.365	343	1.9882e-05
Hyperplasia of prostate || id:finn-b-N14_PROSTHYPERPLA	Leg fat-free mass (left) || id:ukb-a-280	Inverse variance weighted	462.184	344	2.08118e-05
Hyperplasia of prostate || id:finn-b-N14_PROSTHYPERPLA	Leg predicted mass (left) || id:ukb-a-281	MR Egger	461.486	339	1.03028e-05
Hyperplasia of prostate || id:finn-b-N14_PROSTHYPERPLA	Leg predicted mass (left) || id:ukb-a-281	Inverse variance weighted	463.66	340	8.94004e-06
Hyperplasia of prostate || id:finn-b-N14_PROSTHYPERPLA	Arm fat percentage (right) || id:ukb-a-282	MR Egger	278.139	217	0.00318164
Hyperplasia of prostate || id:finn-b-N14_PROSTHYPERPLA	Arm fat percentage (right) || id:ukb-a-282	Inverse variance weighted	279.053	218	0.0032679
Hyperplasia of prostate || id:finn-b-N14_PROSTHYPERPLA	Arm fat mass (right) || id:ukb-a-283	MR Egger	312.931	253	0.00607097
Hyperplasia of prostate || id:finn-b-N14_PROSTHYPERPLA	Arm fat mass (right) || id:ukb-a-283	Inverse variance weighted	315.343	254	0.00526273
Hyperplasia of prostate || id:finn-b-N14_PROSTHYPERPLA	Arm fat-free mass (right) || id:ukb-a-284	MR Egger	417.232	329	0.000691295
Hyperplasia of prostate || id:finn-b-N14_PROSTHYPERPLA	Arm fat-free mass (right) || id:ukb-a-284	Inverse variance weighted	419.264	330	0.000622379
Hyperplasia of prostate || id:finn-b-N14_PROSTHYPERPLA	Arm predicted mass (right) || id:ukb-a-285	MR Egger	443.274	339	0.000116662
Hyperplasia of prostate || id:finn-b-N14_PROSTHYPERPLA	Arm predicted mass (right) || id:ukb-a-285	Inverse variance weighted	444.334	340	0.000117852
Hyperplasia of prostate || id:finn-b-N14_PROSTHYPERPLA	Arm fat percentage (left) || id:ukb-a-286	MR Egger	284.237	232	0.0108913
Hyperplasia of prostate || id:finn-b-N14_PROSTHYPERPLA	Arm fat percentage (left) || id:ukb-a-286	Inverse variance weighted	285.198	233	0.0110617
Hyperplasia of prostate || id:finn-b-N14_PROSTHYPERPLA	Arm fat mass (left) || id:ukb-a-287	MR Egger	302.614	256	0.0240834
Hyperplasia of prostate || id:finn-b-N14_PROSTHYPERPLA	Arm fat mass (left) || id:ukb-a-287	Inverse variance weighted	307.242	257	0.0172081
Hyperplasia of prostate || id:finn-b-N14_PROSTHYPERPLA	Arm fat-free mass (left) || id:ukb-a-288	MR Egger	419.182	338	0.00170773
Hyperplasia of prostate || id:finn-b-N14_PROSTHYPERPLA	Arm fat-free mass (left) || id:ukb-a-288	Inverse variance weighted	419.832	339	0.00179434
Hyperplasia of prostate || id:finn-b-N14_PROSTHYPERPLA	Arm predicted mass (left) || id:ukb-a-289	MR Egger	434.792	333	0.000143386
Hyperplasia of prostate || id:finn-b-N14_PROSTHYPERPLA	Arm predicted mass (left) || id:ukb-a-289	Inverse variance weighted	434.8	334	0.000165224
Hyperplasia of prostate || id:finn-b-N14_PROSTHYPERPLA	Trunk fat percentage || id:ukb-a-290	MR Egger	280.154	221	0.0043094
Hyperplasia of prostate || id:finn-b-N14_PROSTHYPERPLA	Trunk fat percentage || id:ukb-a-290	Inverse variance weighted	280.333	222	0.00482133
Hyperplasia of prostate || id:finn-b-N14_PROSTHYPERPLA	Trunk fat mass || id:ukb-a-291	MR Egger	339.265	266	0.00157591
Hyperplasia of prostate || id:finn-b-N14_PROSTHYPERPLA	Trunk fat mass || id:ukb-a-291	Inverse variance weighted	342.218	267	0.0012652
Hyperplasia of prostate || id:finn-b-N14_PROSTHYPERPLA	Trunk fat-free mass || id:ukb-a-292	MR Egger	524.126	388	4.65016e-06
Hyperplasia of prostate || id:finn-b-N14_PROSTHYPERPLA	Trunk fat-free mass || id:ukb-a-292	Inverse variance weighted	526.861	389	3.74682e-06
Hyperplasia of prostate || id:finn-b-N14_PROSTHYPERPLA	Trunk predicted mass || id:ukb-a-293	MR Egger	525.237	389	4.68042e-06
Hyperplasia of prostate || id:finn-b-N14_PROSTHYPERPLA	Trunk predicted mass || id:ukb-a-293	Inverse variance weighted	529.175	390	3.19639e-06
